# Supplementary material for: Thylakoid protein FPB1 synergistically cooperates with PAM68 to promote CP47 biogenesis and Photosystem II assembly
Source: PubMed Central journal article supplement (PMC11006888; doi:10.1038/s41467-024-46863-y), 2024-04-10
Supplement: 41467_2024_46863_MOESM3_ESM.pdf [file 41467_2024_46863_MOESM3_ESM.pdf]

## Description of Additional Supplementary Files

### **Supplementary Data Legends**

**Supplementary Data 1:** Summary for the proteins detected in the Co-IP samples by mass spectrometry.

**Supplementary Data 2:** RNA-seq and Ribo-seq read counts statistics.

**Supplementary Data 3:** Genome-wide analysis of the ribosome footprints distribution along the chloroplast ORFs in different mutants and WT
